# Supplementary material
Source: bioRxiv or medRxiv preprint supplement (https://medrxiv.org/highwire/filestream/93798/field_highwire_adjunct_files/3/2020.05.09.20096511-4.pdf)

## Supplementary Figure 2: Functional summary of DKD-induced ACE2+ expression signature.

(A) The DKD-induced ACE2+ signature was used for community clustering in a PTEC-specific functional network to identify enriched processes and pathways. DKD-induced genes are significantly upregulated in DKD ACE2+ cells compared to LD ACE2+ cells, representing a signature pinpointing unique molecular features of the DKD ACE2-expressing cells.

(B) Highlight of DKD-induced ACE2+ signature genes (red circles) shared with the set of proteins that increase expression in response to SARS-CoV-2 infection (Bojkova proteome\* , Supplementary Table 7). Red text indicates modules with the strongest overlap ( $p < 0.05$ ), thus highlighting modules and processes in the ACE2+ signature relevant to SARS-CoV-2 infection.

### A. DKD-induced ACE2+ signature

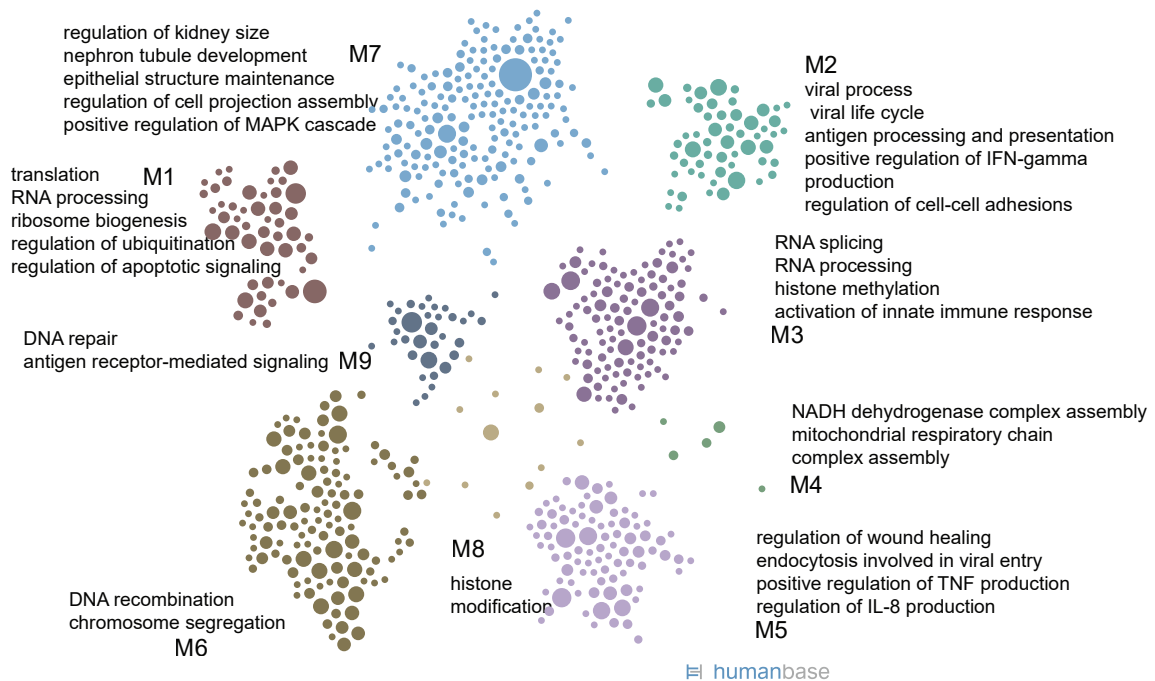

### B. SARS-CoV-2 Bojkova proteome overlap with DKD-induced ACE2+ signature

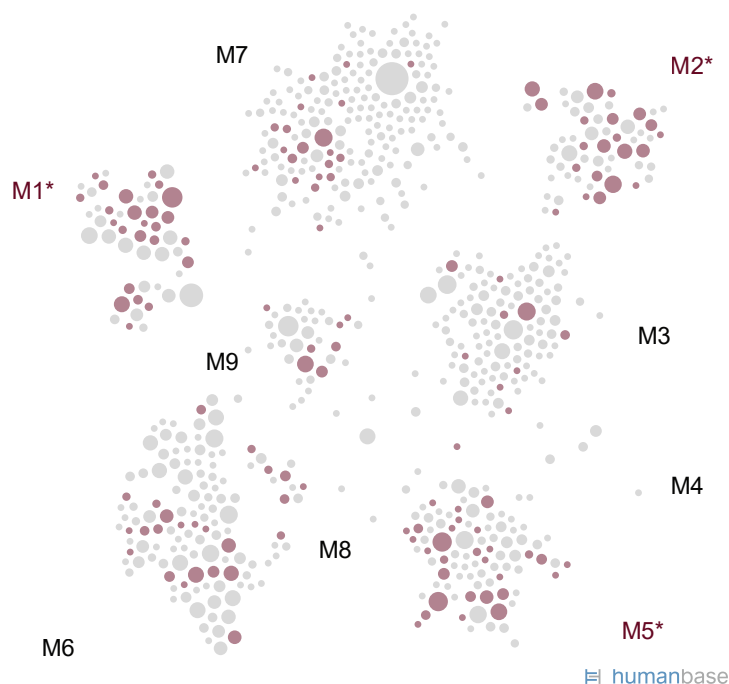

Supplement: Supplementary file [file 2020.05.09.20096511-4.pdf]
